# Supplementary material for: An insight into embryogenesis interruption by carbon nitride dots: can they be nucleobase analogs?
Source: Royal Society of Chemistry journal article supplement (doi:10.1039/d2nr04778k), 2022-01-01
Supplement: d2nr04778k1.pdf [file d2nr04778k1.pdf]

## An Insight into Embryogenesis Interruption by Carbon Nitride Dots: Can They Be Nucleobase Analogs?

Yiqun Zhou,<sup>1,2,3,§</sup> Jiuyan Chen,<sup>1,§</sup> Emel Kirbas Cilingir,<sup>1</sup> Wei Zhang,<sup>1</sup> Lemay Gonzalez,<sup>4</sup> Samuel Perez,<sup>4</sup> Arjuna Davila,<sup>4</sup> Nicholas Brejcha,<sup>4</sup> Jun Gu,<sup>1</sup> Wenquan Shi,<sup>5</sup> Justin B. Domena,<sup>1</sup> Braulio C.L.B. Ferreira,<sup>1</sup> Fuwu Zhang,<sup>1</sup> Frederic A. Vallejo,<sup>6</sup> Daniela Toledo,<sup>1</sup> Piumi Y. Liyanage,<sup>7</sup> Regina M. Graham,<sup>6</sup> Julia Dallman,<sup>8</sup> Zhili Peng,<sup>5</sup> Christian Agatemor,<sup>1,9</sup> Alessandro Catenazzi,<sup>3,\*</sup> Roger M. Leblanc<sup>1,\*</sup>

<sup>1</sup> Department of Chemistry, University of Miami, Coral Gables, FL 33146, USA

<sup>2</sup> C-Dots, LLC, Miami, FL 33136, USA

<sup>3</sup> Department of Biological Sciences, Florida International University, Miami, FL 33199, USA

<sup>4</sup> Miami Dade College North Campus, Miami, FL 33167, USA

<sup>5</sup> National Center for International Research on Photoelectric and Energy Materials, School of Materials and Energy, Yunnan University, Kunming, Yunnan 650091, People's Republic of China

<sup>6</sup> Department of Neurological Surgery, Miller School of Medicine, University of Miami, Miami, FL 33136, USA

<sup>7</sup> Indium Corporation of America, Clinton, NY 13323, USA

<sup>8</sup> Department of Biology, University of Miami, Coral Gables, FL 33146, USA

<sup>9</sup> Sylvester Comprehensive Cancer Center, University of Miami, Miami, FL 33136, USA

§ Both authors contributed equally to this work

\* Corresponding authors: acatenazzi@gmail.com (AC), rml@miami.edu (RML)

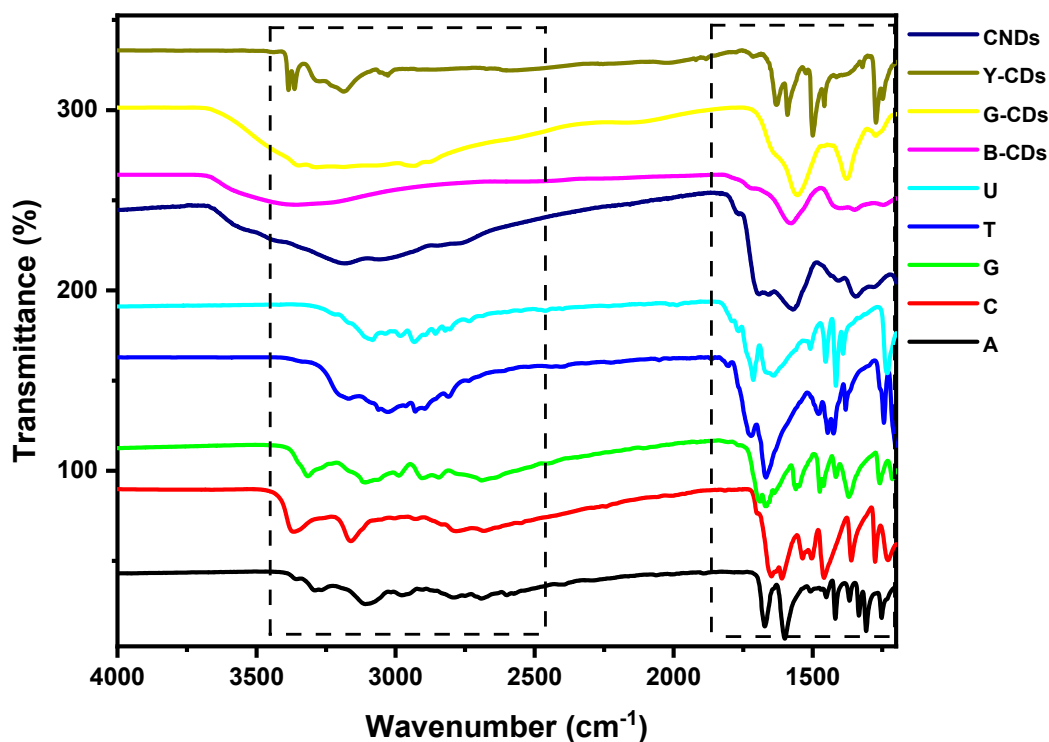

**Fig. S1.** The FTIR spectra of different CDs including the bare CNDs, Y-CDs, G-CDs, and B-CDs, in comparison to different nucleobases, namely adenine (A), cytosine (C), guanine (G), thymine (T), and uracil (U). Air was used for background subtraction.

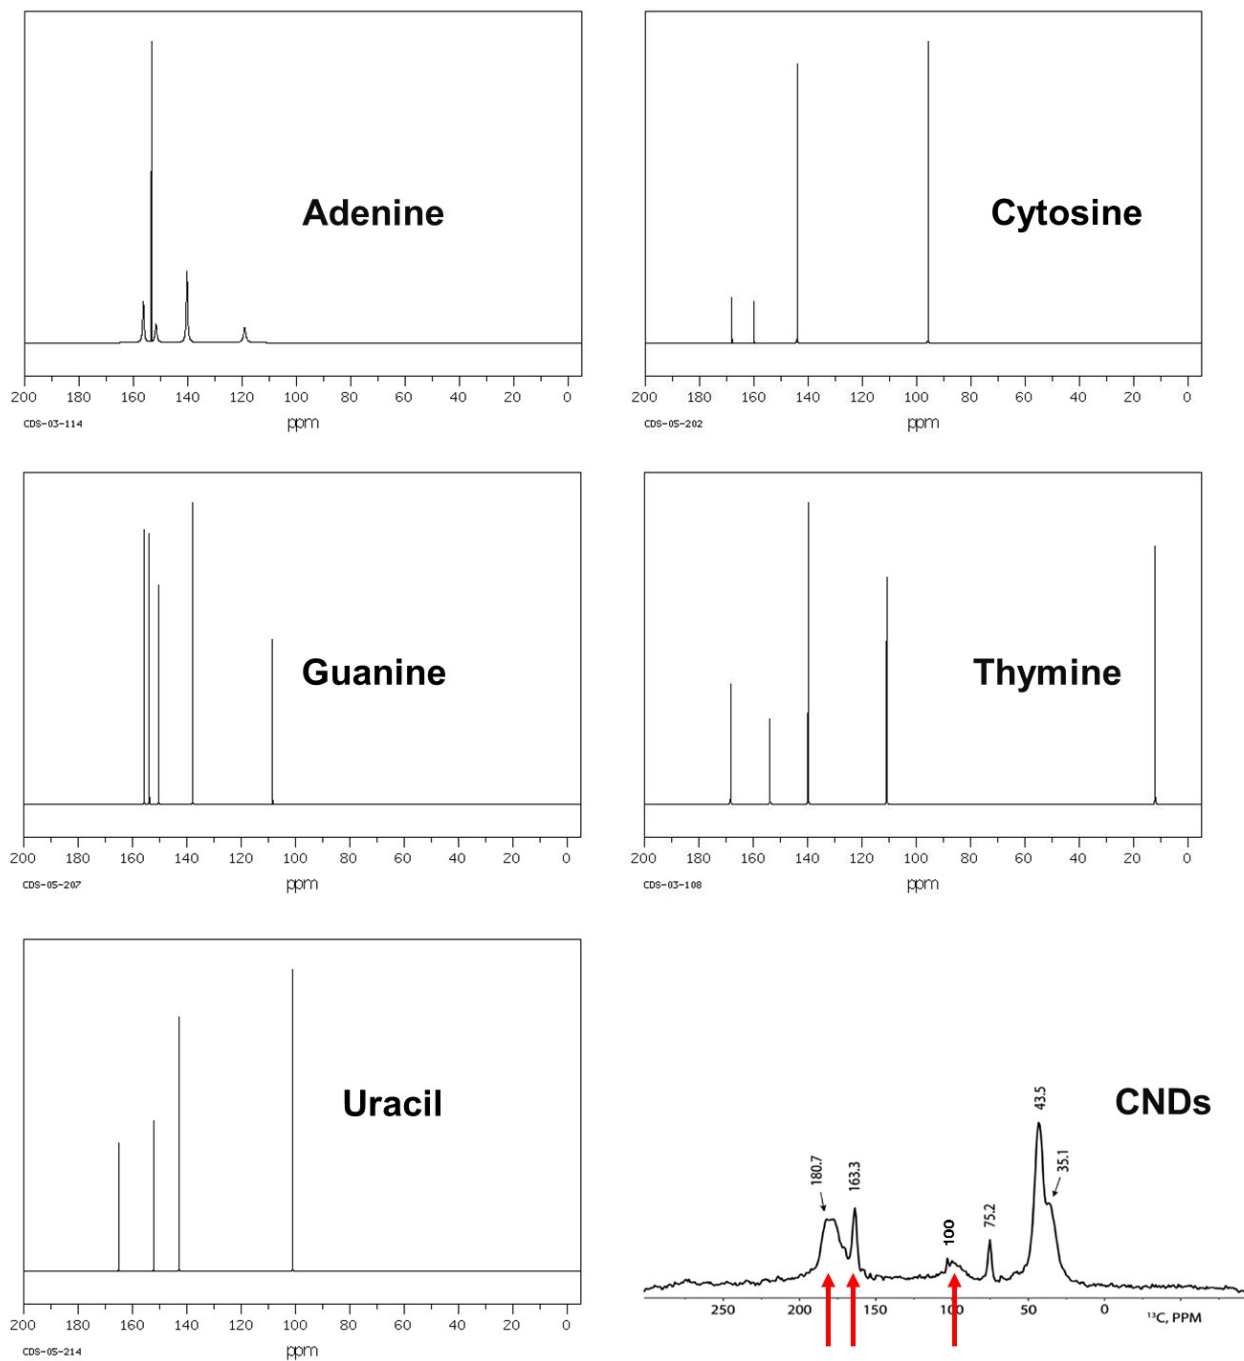

**Fig. S2.** Solid-state  $^{13}\text{C}$  NMR spectra of bare CNDs and different nucleobases, namely adenine, cytosine, guanine, thymine, and uracil. The solid-state  $^{13}\text{C}$  NMR spectra of different nucleobases originate from Chemical Book.com. And the spectrum of bare CNDs was adapted from our previous study<sup>1</sup>. Red arrows point to similar chemical shifts shared by CNDs and some nucleobases.

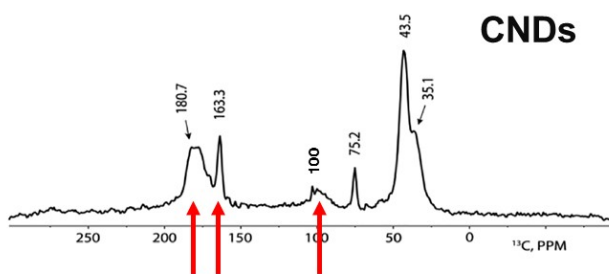

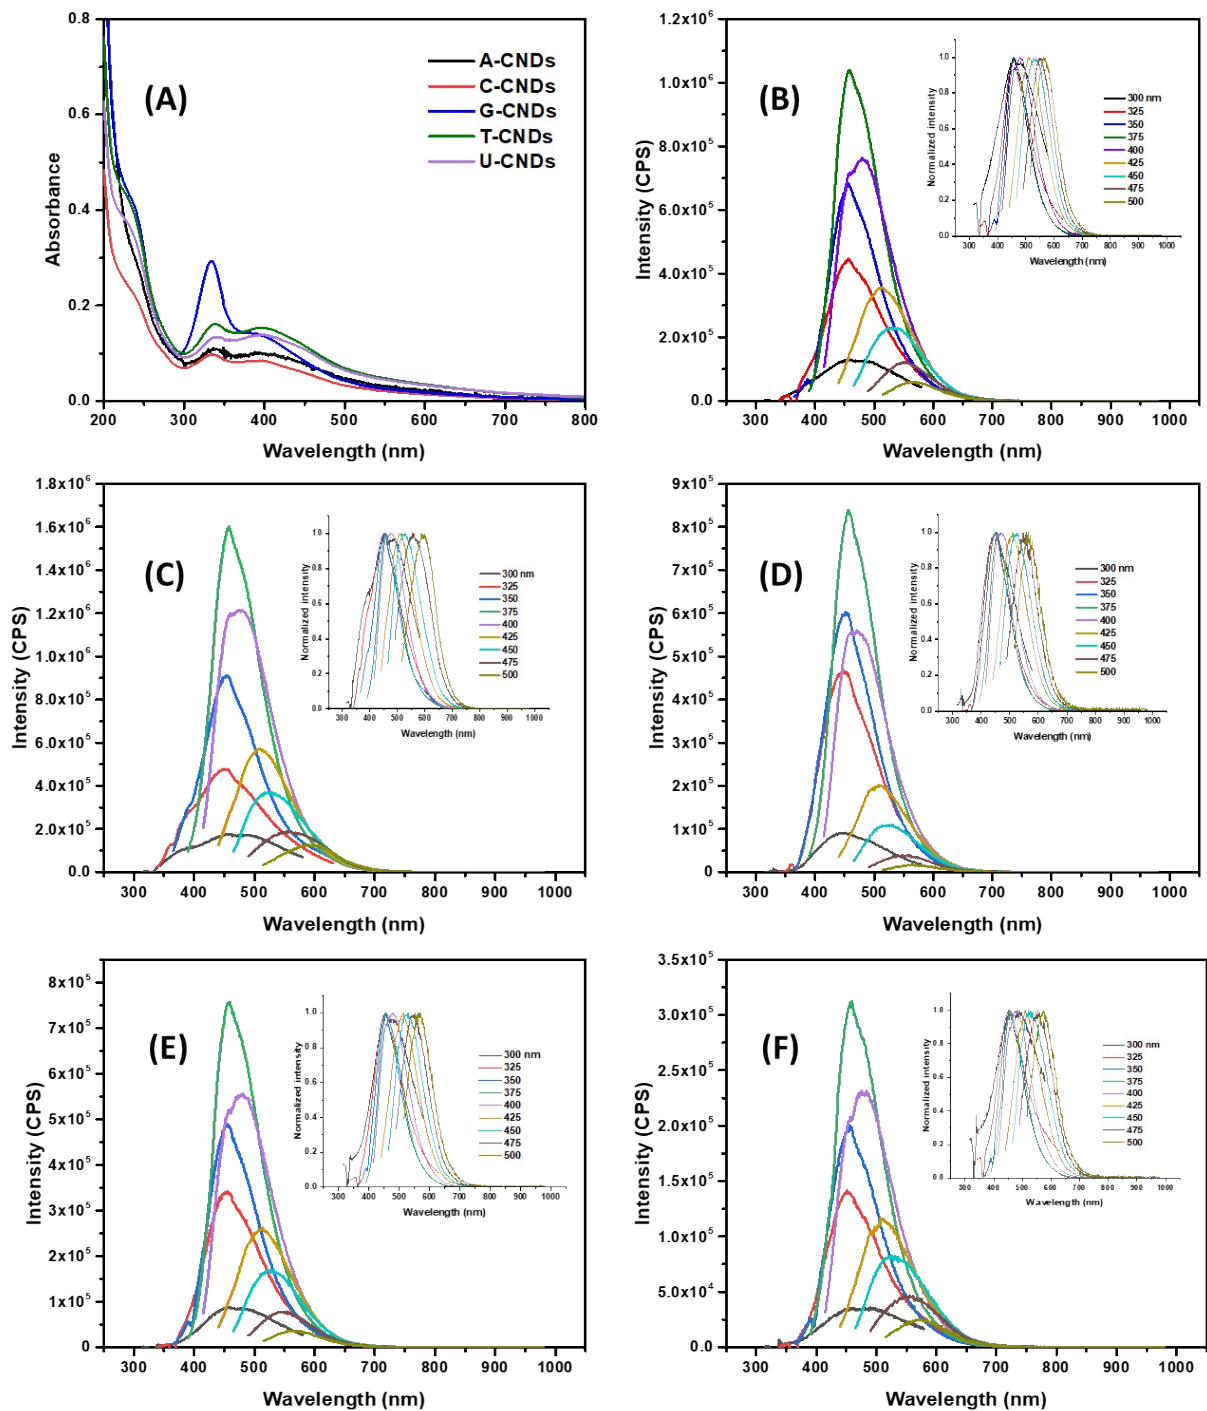

**Fig. S3.** UV/vis absorption spectra of A-CNDs ( $1 \times 10^{-2}$  mg/mL), C-CNDs ( $5 \times 10^{-2}$  mg/mL), G-CNDs ( $2 \times 10^{-2}$  mg/mL), T-CNDs ( $2 \times 10^{-2}$  mg/mL) and U-CNDs ( $2 \times 10^{-2}$  mg/mL) (A). Fluorescence emission spectra of distinct CNDs: A-CNDs ( $1 \times 10^{-2}$  mg/mL) (B), C-CNDs ( $2 \times 10^{-2}$  mg/mL) (C), G-CNDs ( $5 \times 10^{-3}$  mg/mL) (D), T-CNDs ( $5 \times 10^{-3}$  mg/mL) (E) and U-CNDs ( $5 \times 10^{-3}$  mg/mL) (F).

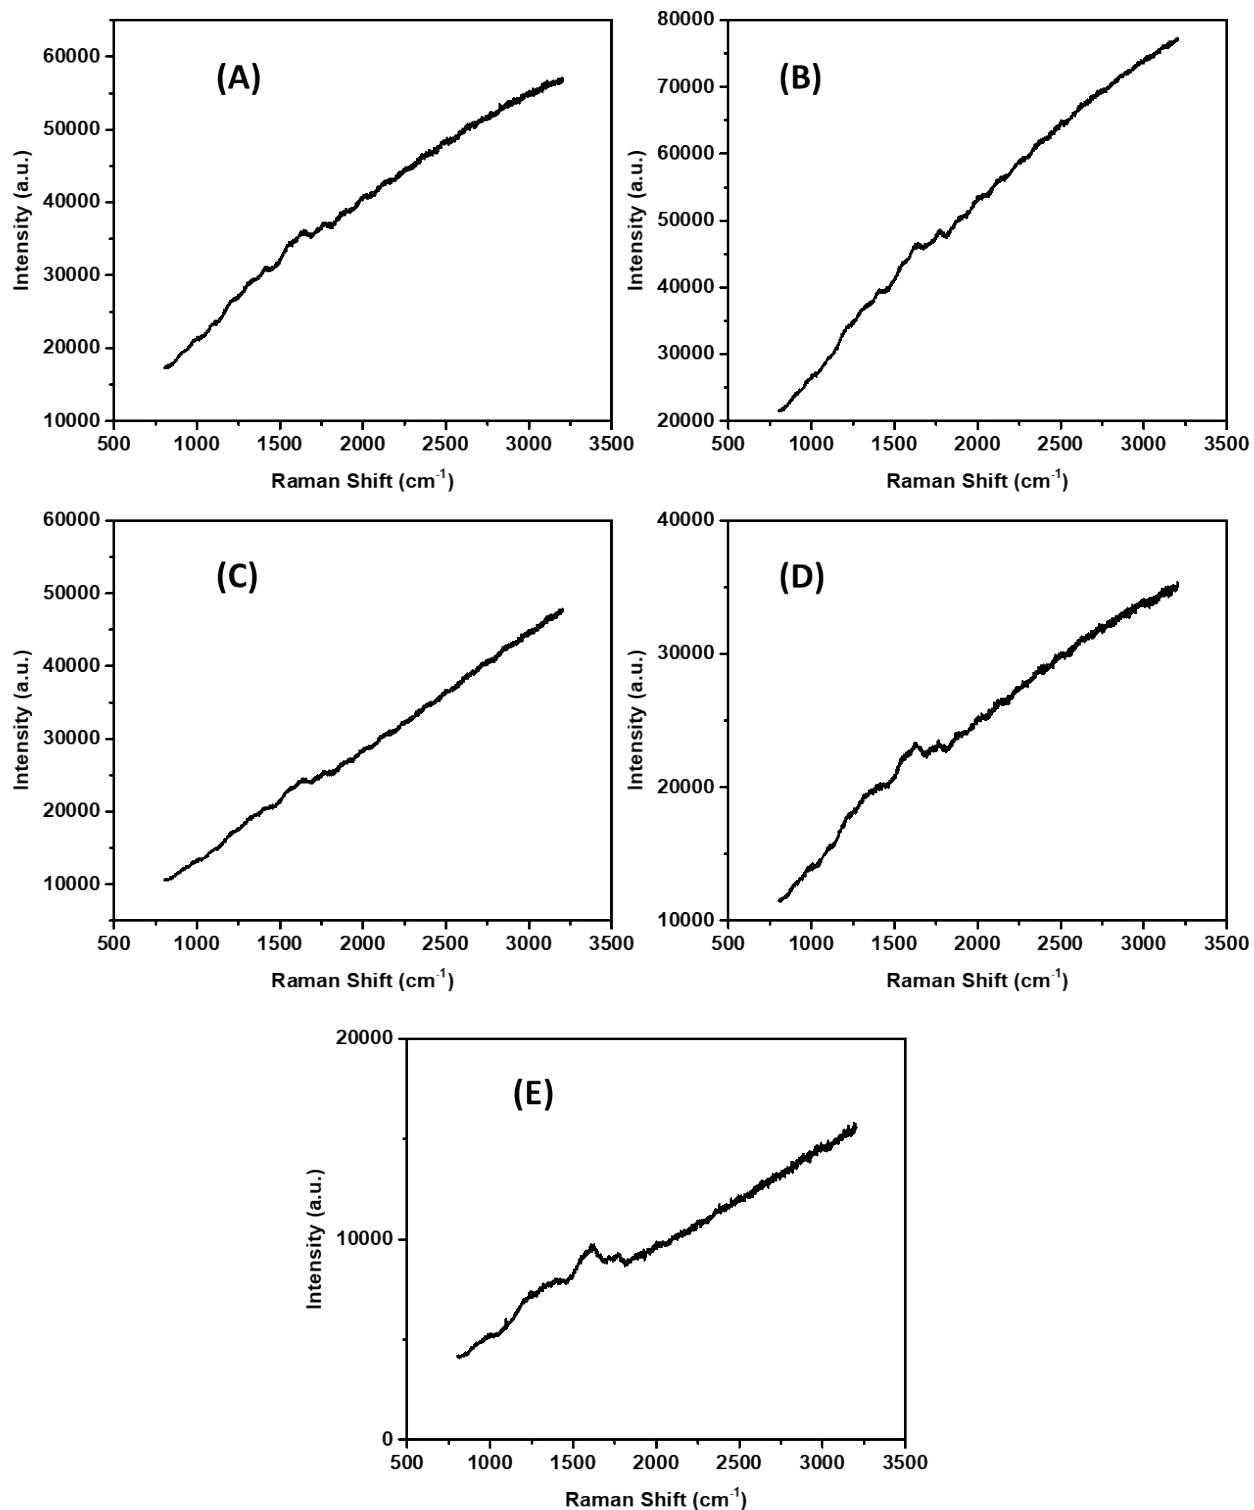

**Fig. S4.** Raman spectra of different nucleobase-doped CNDs (**A-E**, A-CNDs, C-CNDs, G-CNDs, T-CNDs, U-CNDs, respectively).

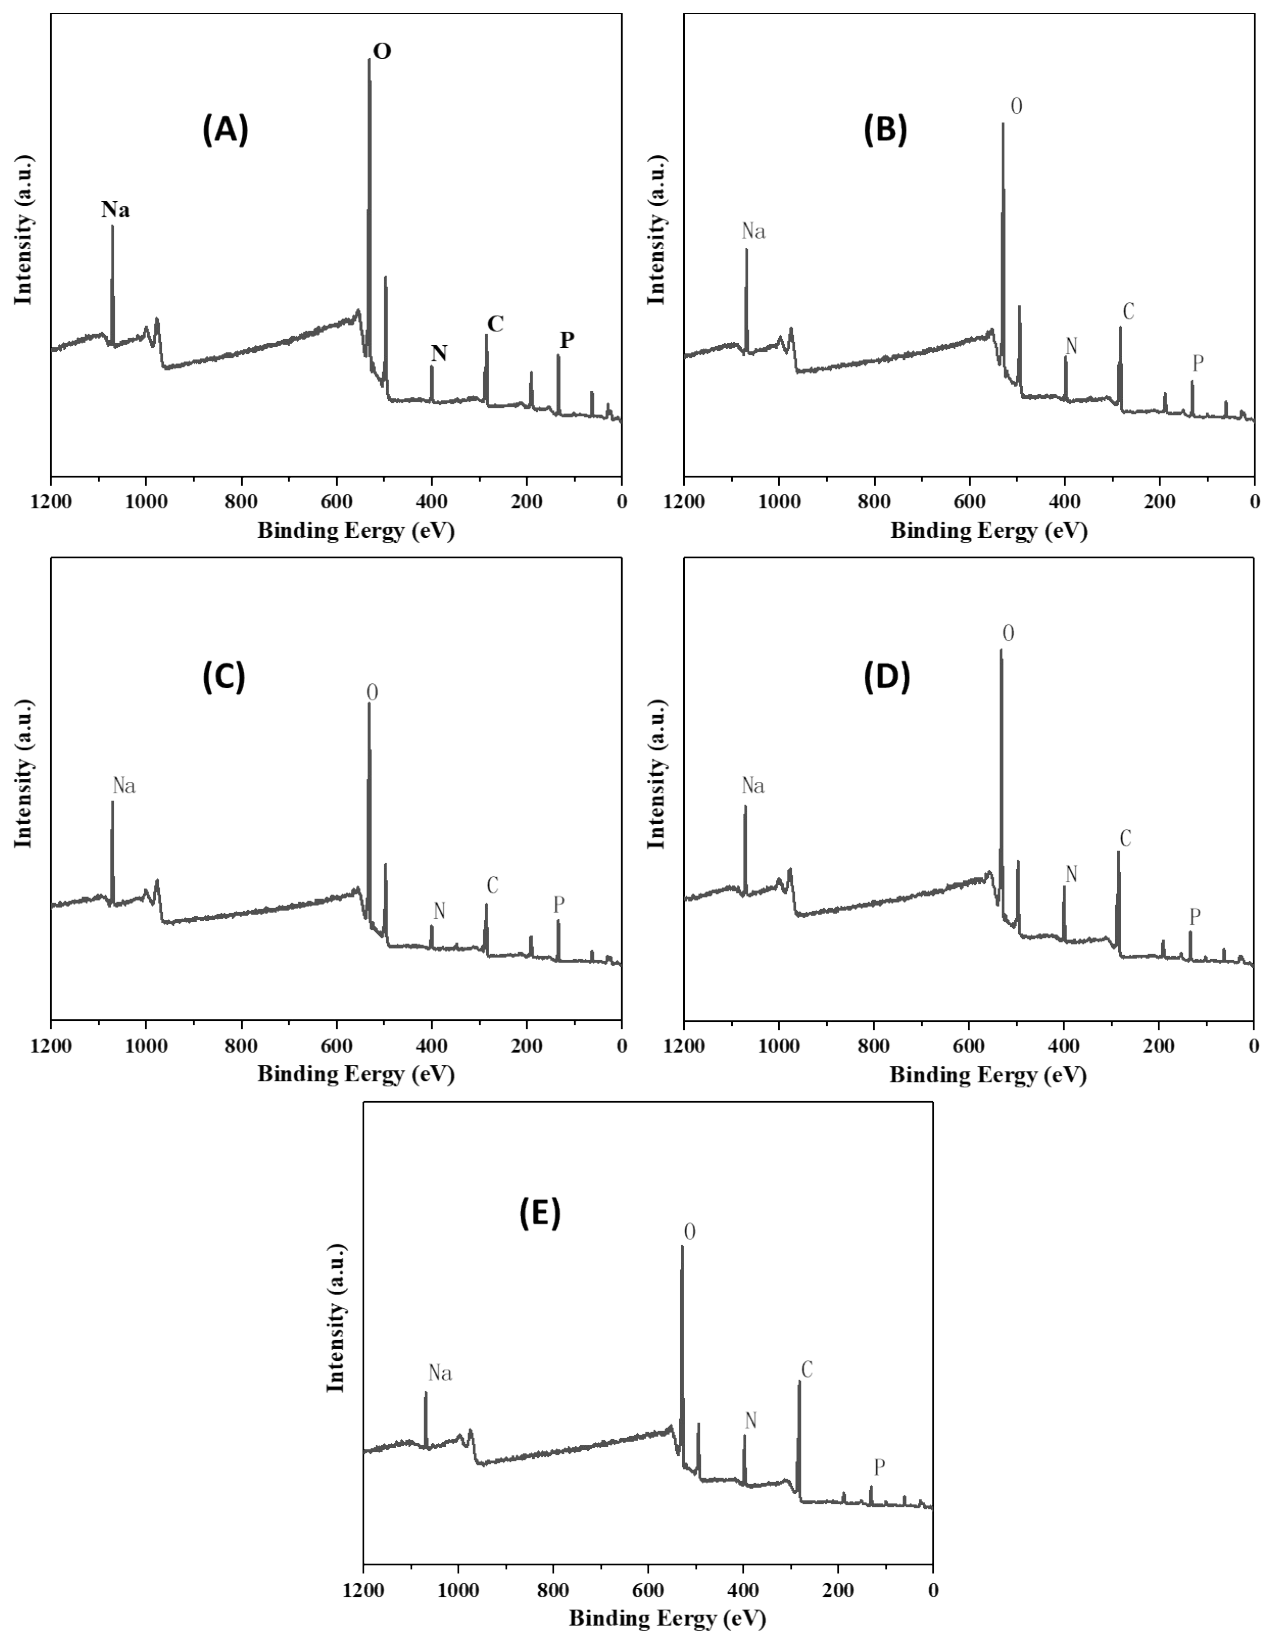

**Fig. S5.** XPS full spectra of different nucleobase-doped CNDs (A-E, A-CNDs, C-CNDs, G-CNDs, T-CNDs, U-CNDs, respectively).

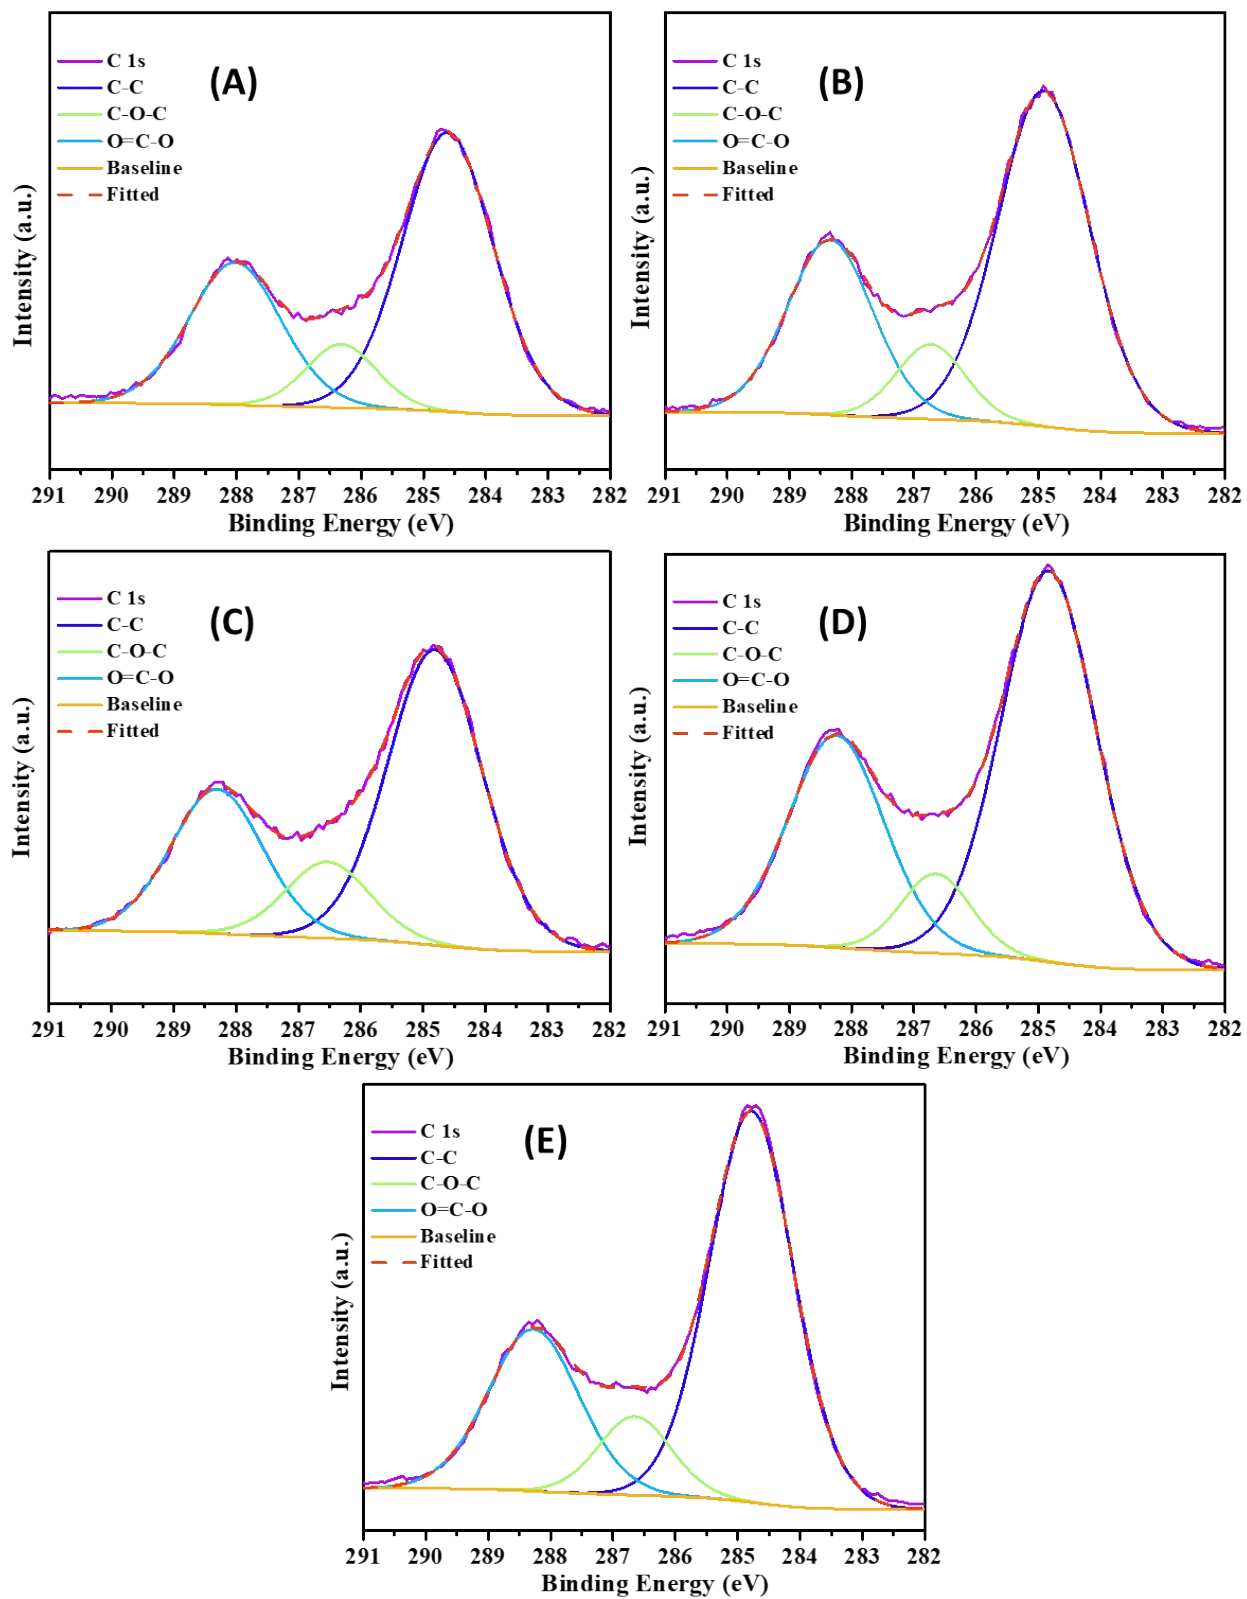

**Fig. S6.** High-resolution C 1s spectra of different nucleobase-doped CNDs (**A-E**, A-CNDs, C-CNDs, G-CNDs, T-CNDs, U-CNDs, respectively).

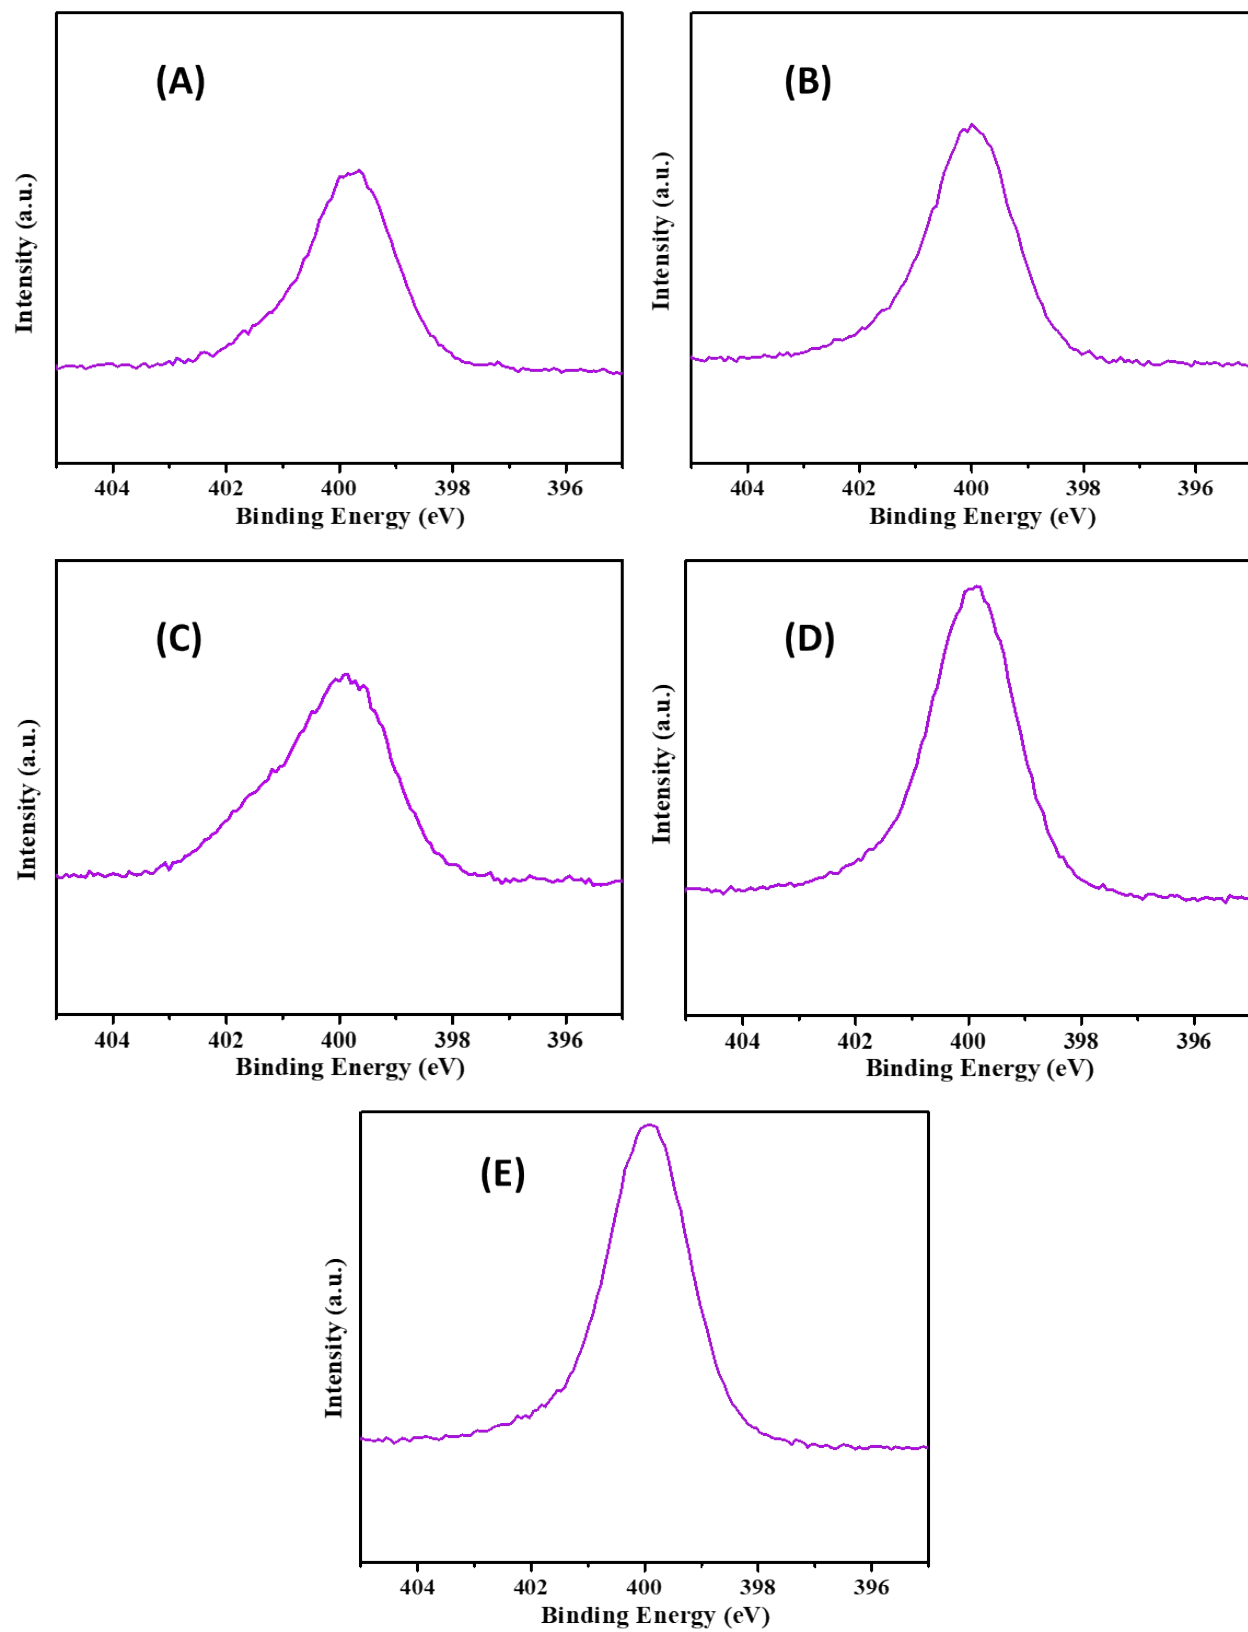

**Fig. S7.** High-resolution N 1s spectra of different nucleobase-doped CNDs (**A-E**, A-CNDs, C-CNDs, G-CNDs, T-CNDs, U-CNDs, respectively).

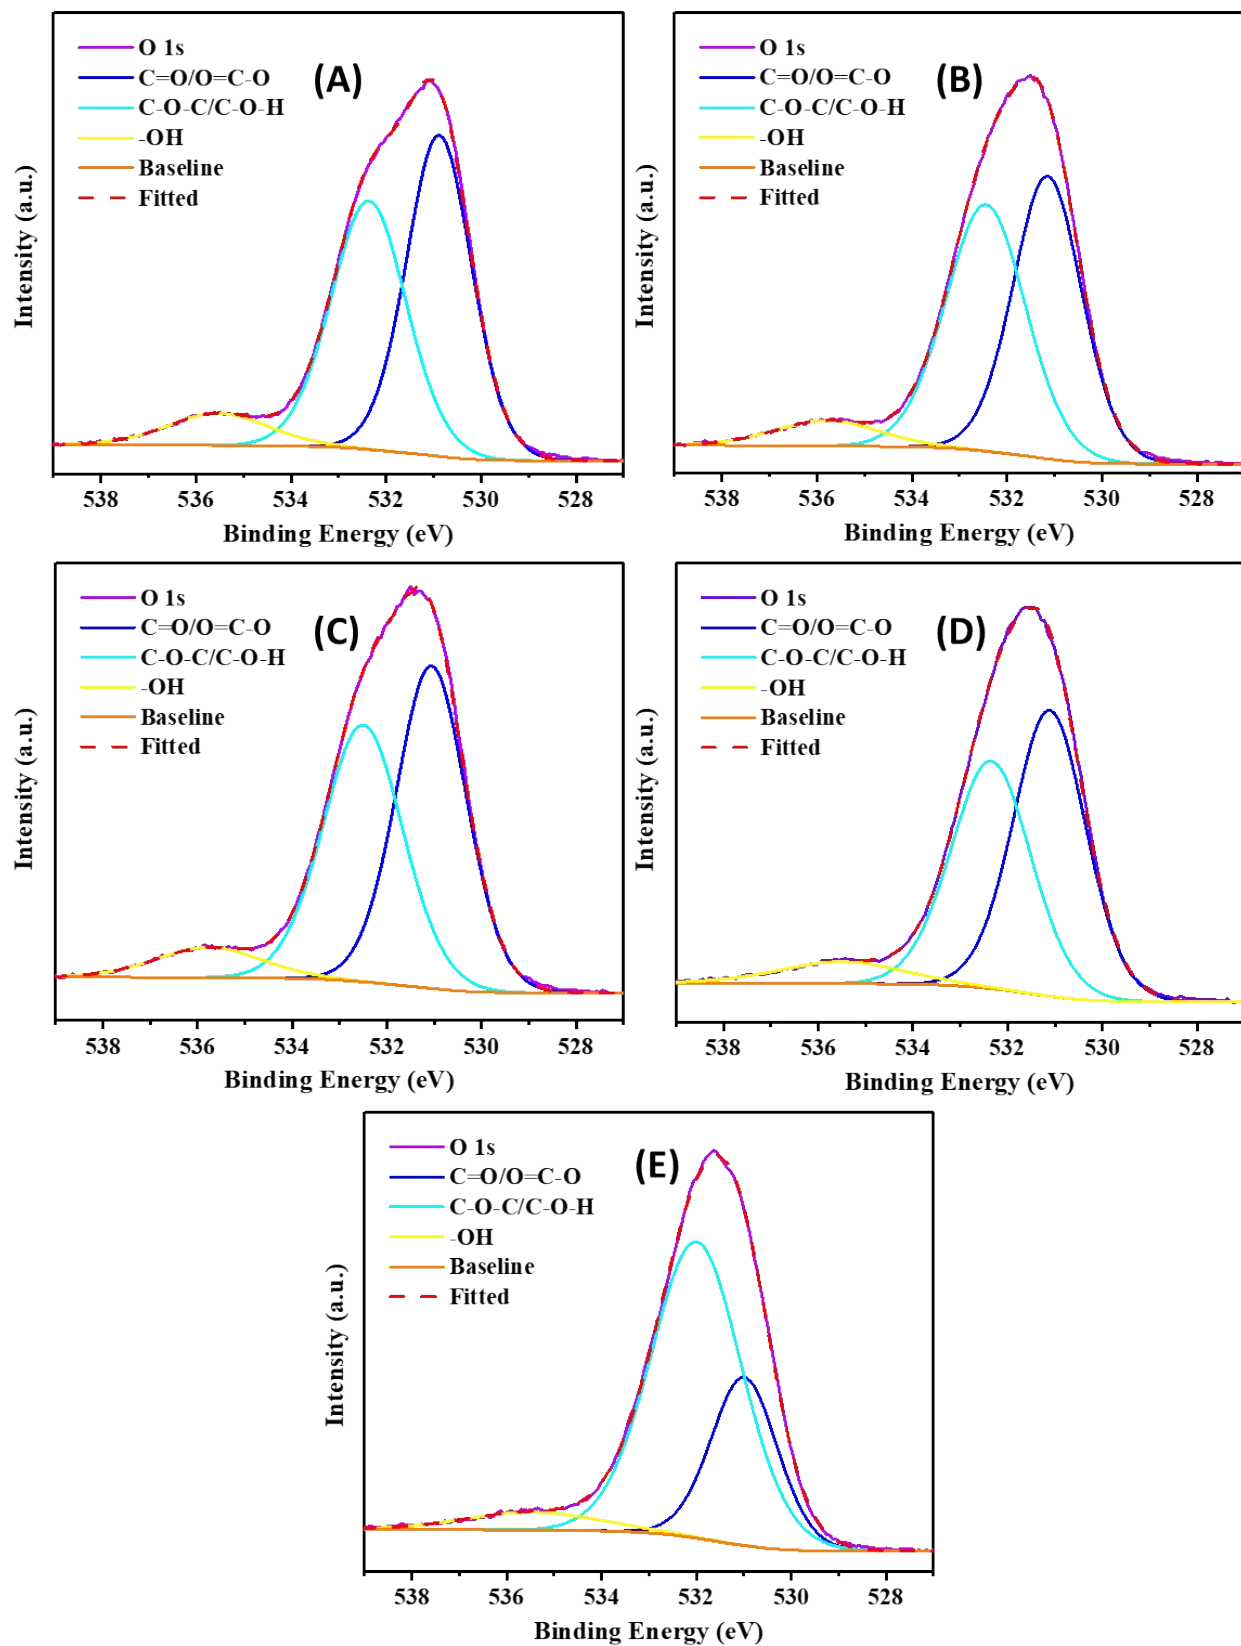

**Fig. S8.** High-resolution O 1s spectra of different nucleobase-doped CNDs (**A-E**, A-CNDs, C-CNDs, G-CNDs, T-CNDs, U-CNDs, respectively).



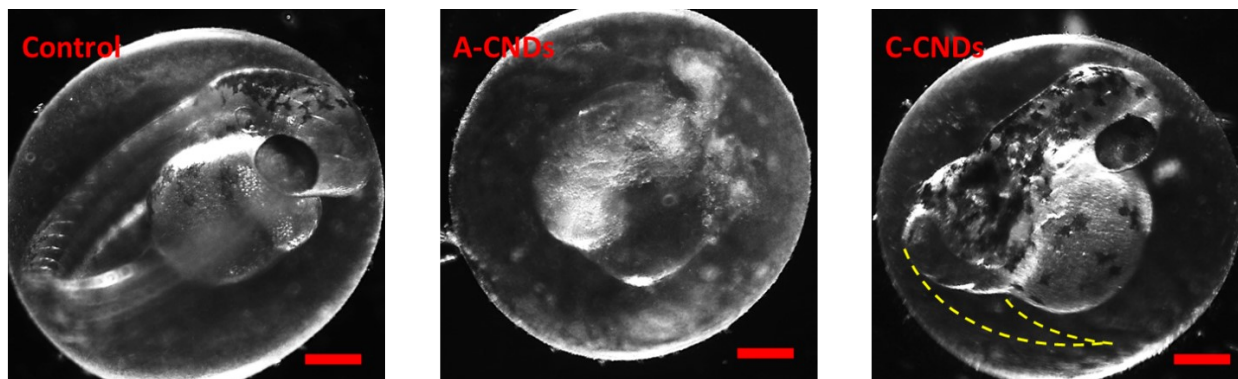

**Fig. S9.** Abnormal development of zebrafish embryos (48 hpf) treated with a high concentration (100  $\mu\text{g/mL}$ ) of A-CNDs and C-CNDs. The area depicted by the yellow dash line represents the tail detachment. The scale bars represent 160 pixels.

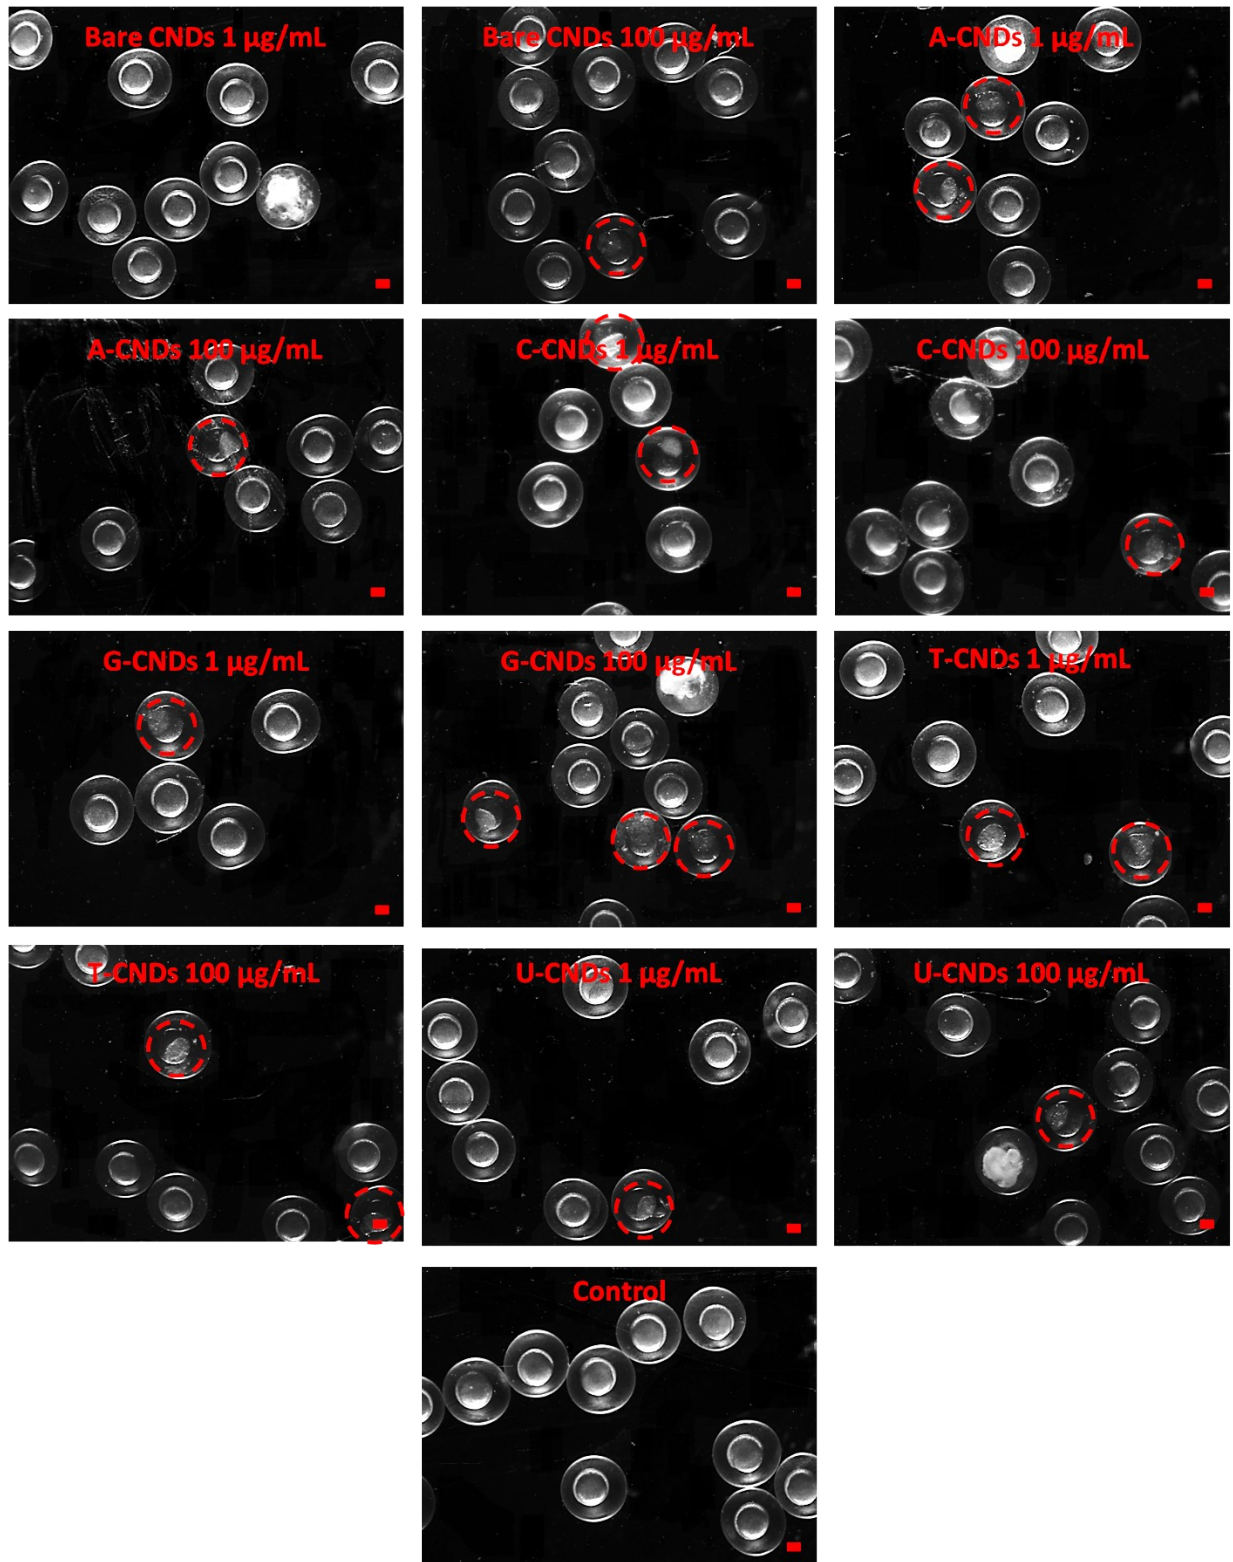

**Fig. S10.** Morphology of zebrafish embryos (8 hpf) treated with different CNDs at two different concentrations. The scale bars represent 160 pixels. Diseased embryos are circled in red.

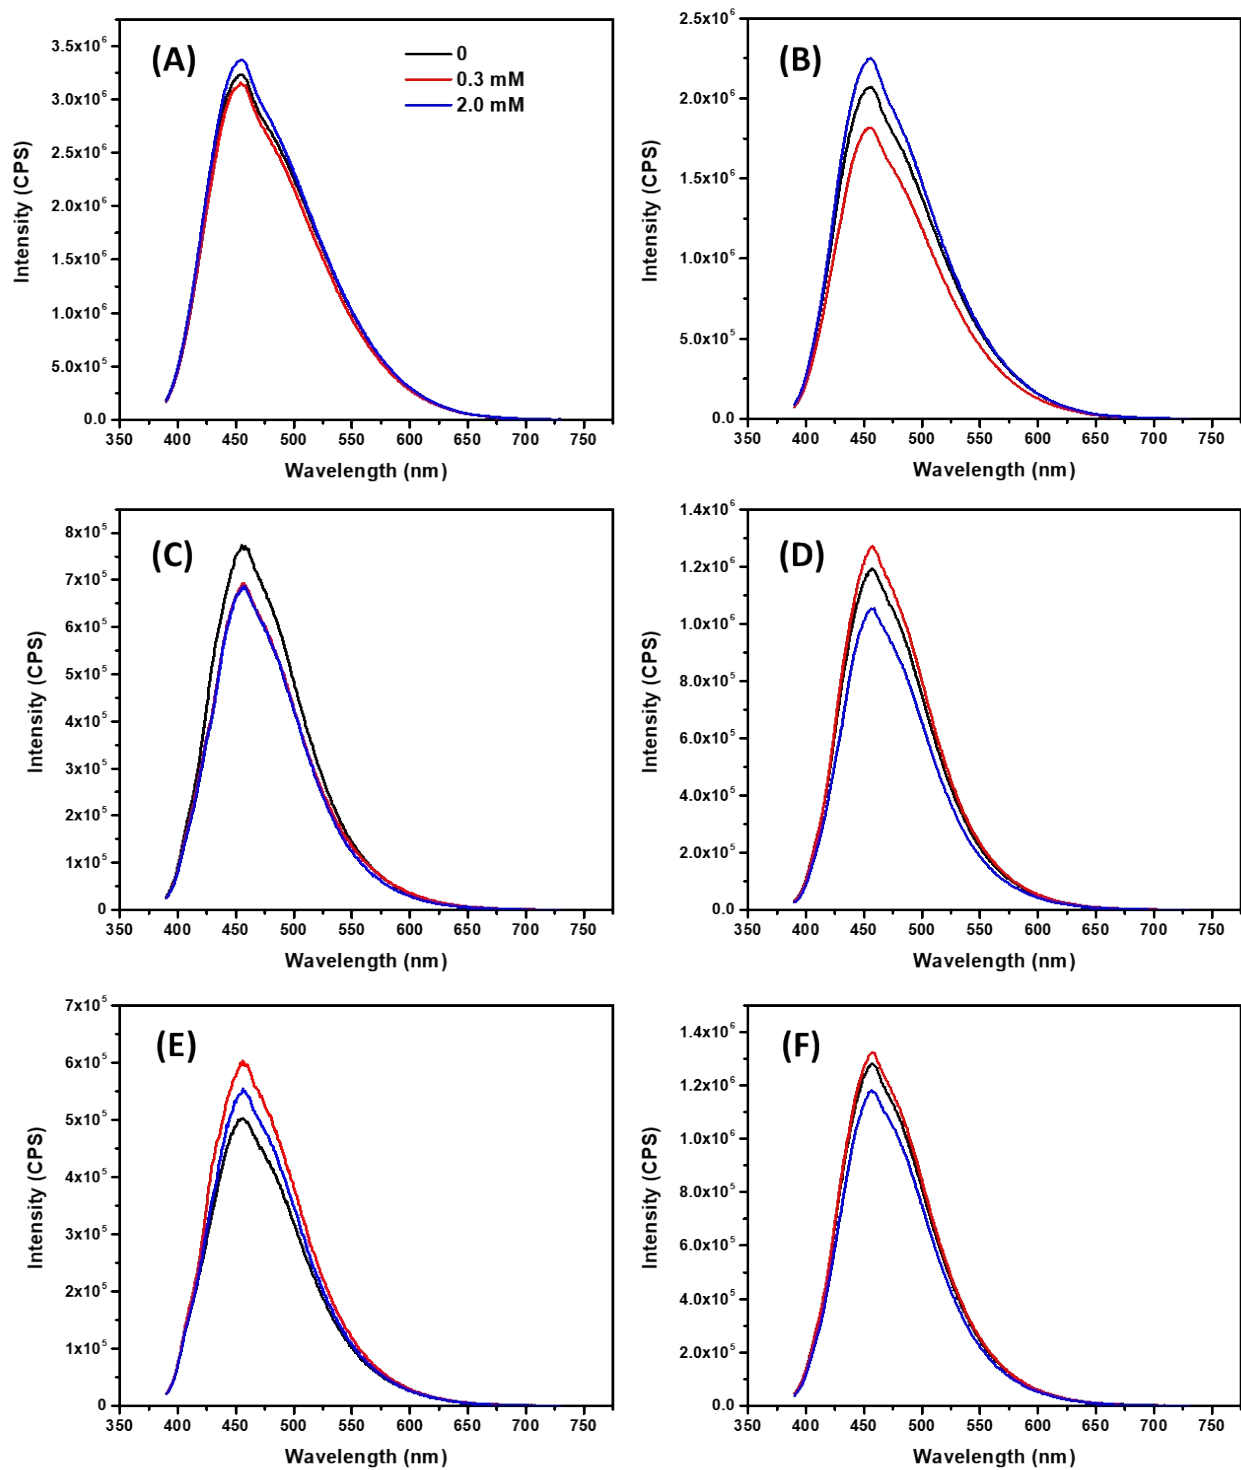

**Fig. S11.** Fluorescence emission spectra of distinct CNDs (1 μg/mL) in presence of different concentrations of Ca<sup>2+</sup> (0, 0.3 and 2 mM): Bare CNDs (A), A-CNDs (B), C-CNDs (C), G-CNDs (D), T-CNDs (E) and U-CNDs (F).

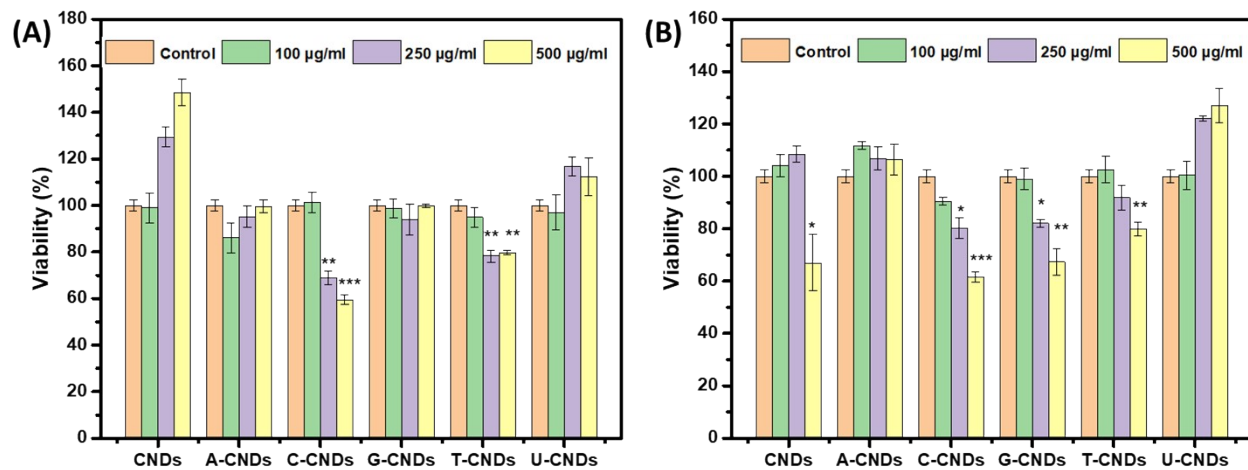

**Fig. S12.** Viability of PC-3 (A) and 4T1 (B) cells treated with different concentrations (100, 250 and 500 µg/mL) of bare and various nucleobase-doped CNDs. \* $p < 0.05$ , \*\* $p < 0.01$ , \*\*\* $p < 0.001$  compared to non-treated controls.

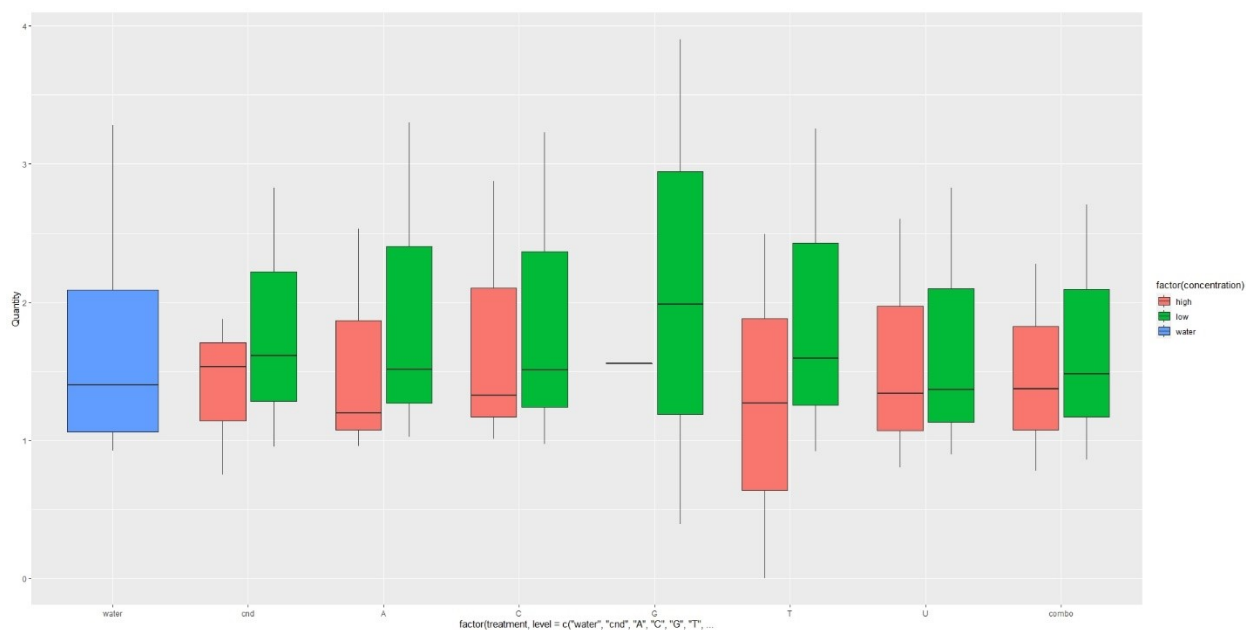

**Fig. S13.** Amplification plot of the zebrafish polymerase alpha-1 gene in presence of bare and doped CNDs (after omitting two outliers for G-CNDs at high concentrations).

**Table S1.** FWHM of different nucleobase-doped CNDs.

| CND species | Bare CNDs | A-CNDs | C-CNDs | G-CNDs | T-CNDs | U-CNDs |
|-------------|-----------|--------|--------|--------|--------|--------|
| FWHM (nm)   | 105       | 91     | 92     | 87     | 89     | 89     |

**Table S2.** XPS atomic percentages of different nucleobase-doped CNDs.

|       | Peak (eV) | A-CNDs (%) | C-CNDs (%) | G-CNDs (%) | T-CNDs (%) | U-CNDs (%) |
|-------|-----------|------------|------------|------------|------------|------------|
| Na 1s | 1070      | 6          | 6          | 8          | 5          | 3          |
| O 1s  | 531       | 47         | 41         | 46         | 38         | 31         |
| N 1s  | 400       | 7          | 9          | 7          | 10         | 11         |
| C 1s  | 285       | 29         | 37         | 30         | 42         | 50         |
| P 2p  | 134       | 11         | 7          | 10         | 6          | 4          |

**Table S3.** Binding energies and peak areas for C 1s of different nucleobase-doped CNDs.

| Peak (eV) | Bond  | A-CNDs (%) | C-CNDs (%) | G-CNDs (%) | T-CNDs (%) | U-CNDs (%) |
|-----------|-------|------------|------------|------------|------------|------------|
| 284.6     | C-C   | 59.09      | 60.53      | 55.95      | 58.97      | 61.78      |
| 286.3     | C-O-C | 10.43      | 10.07      | 12.95      | 8.81       | 10.71      |
| 288.0     | O=C-O | 30.48      | 29.4       | 26.57      | 32.23      | 27.51      |

**Table S4.** Binding energies and peak areas for O 1s of different nucleobase-doped CNDs.

| Peak (eV) | Bond        | A-CNDs (%) | C-CNDs (%) | G-CNDs (%) | T-CNDs (%) | U-CNDs (%) |
|-----------|-------------|------------|------------|------------|------------|------------|
| 530.8     | O=C-O/C=O   | 48.87      | 46.47      | 48.76      | 49.84      | 27.65      |
| 532.4     | C-O-C/C-O-H | 43.59      | 47.19      | 44.32      | 43.70      | 66.33      |
| 535.5     | -OH         | 7.54       | 6.34       | 6.93       | 6.46       | 6.02       |

**Table S5.** Functional moiety identification and quantification by TGA and DTG measurements.

|                  | Original                  |                    |                     |                     |       |                      |         |                | Recalculated |       |                  |       |      |                                   |
|------------------|---------------------------|--------------------|---------------------|---------------------|-------|----------------------|---------|----------------|--------------|-------|------------------|-------|------|-----------------------------------|
|                  | adsorbed H <sub>2</sub> O | -OH, alcohol       | C=O + COOH + C-O    | amines              | shell | Core                 | remnant | effective mass | -OH          | amine | C=O + COOH + C-O | shell | core | OH + NH <sub>2</sub> on the shell |
| <b>Bare CNDs</b> | (40-122 °C)<br>9%         | (122-168 °C)<br>2% | (168-338 °C)<br>18% | (338-448 °C)<br>18% | 38%   | (448-1000 °C)<br>53% | 0       | 91%            | 2%           | 20%   | 20%              | 42%   | 58%  | 57%                               |
| <b>A-CNDs</b>    | (40-122 °C)<br>9%         | (122-147 °C)<br>1% | (147-338 °C)<br>18% | (338-498 °C)<br>20% | 39%   | (498-1000 °C)<br>13% | 39%     | 52%            | 2%           | 38%   | 35%              | 75%   | 25%  | 53%                               |
| <b>C-CNDs</b>    | (40-102 °C)<br>8%         | (102-133 °C)<br>2% | (133-354 °C)<br>21% | (354-459 °C)<br>23% | 46%   | (459-1000 °C)<br>29% | 17%     | 75%            | 3%           | 31%   | 28%              | 62%   | 38%  | 55%                               |
| <b>G-CNDs</b>    | (40-121 °C)<br>8%         | (121-147 °C)<br>1% | (147-338 °C)<br>18% | (338-508 °C)<br>33% | 52%   | (508-1000 °C)<br>16% | 24%     | 68%            | 1%           | 49%   | 26%              | 76%   | 24%  | 66%                               |
| <b>T-CNDs</b>    | (40-116 °C)<br>8%         | (116-147 °C)<br>1% | (147-338 °C)<br>22% | (338-533 °C)<br>33% | 56%   | (533-1000 °C)<br>6%  | 30%     | 62%            | 2%           | 53%   | 35%              | 90%   | 10%  | 61%                               |
| <b>U-CNDs</b>    | (40-122 °C)<br>10%        | (122-147 °C)<br>1% | (147-328 °C)<br>22% | (328-508 °C)<br>39% | 62%   | (508-1000 °C)<br>14% | 14%     | 76%            | 1%           | 51%   | 29%              | 81%   | 19%  | 64%                               |

**Table S6.** Zeta potentials of various nucleobase-doped CNDs.

| CND species                | A-CNDs      | C-CNDs      | G-CNDs      | T-CNDs      | U-CNDs      |
|----------------------------|-------------|-------------|-------------|-------------|-------------|
| <b>Zeta potential (mV)</b> | -23.6 ± 1.5 | -23.8 ± 2.4 | -28.6 ± 0.8 | -30.0 ± 3.4 | -29.1 ± 0.8 |

**Table S7.** Rate of zebrafish embryos with reduced cell adhesion.

|                  | Bare CNDs | A-CNDs | C-CNDs | G-CNDs | T-CNDs | U-CNDs |
|------------------|-----------|--------|--------|--------|--------|--------|
| <b>1 µg/mL</b>   | 0         | 20%    | 20%    | 10%    | 20%    | 10%    |
| <b>100 µg/mL</b> | 10%       | 10%    | 10%    | 30%    | 20%    | 10%    |

**Table S8.** Results of generalized linear model for qPCR comparing amplification of the zebrafish polymerase alpha-1 gene in presence of bare and doped CNDs (after omitting two outliers for G-CNDs at high concentrations).

GLM (formula = value ~ treatment + concentration, family = gaussian (identity), data = zebrafish)

Coefficients:

|                          | Estimate | Std. Error | t value | Pr(> t )     |
|--------------------------|----------|------------|---------|--------------|
| (Intercept)              | 1.57931  | 0.42124    | 3.749   | 0.000605 *** |
| Treatment [T.C]          | 0.06717  | 0.55958    | 0.120   | 0.905109     |
| Treatment [T. bare CNDs] | -0.16067 | 0.55958    | -0.287  | 0.775623     |
| Treatment [T. combo]     | -0.17567 | 0.55958    | -0.314  | 0.755342     |
| Treatment [T. G]         | 0.11866  | 0.62979    | 0.188   | 0.851589     |
| Treatment [T. T]         | -0.16400 | 0.55958    | -0.293  | 0.771102     |
| Treatment [T. U]         | -0.11483 | 0.55958    | -0.205  | 0.838531     |
| Treatment [T. water]     | -0.04083 | 0.55958    | -0.073  | 0.942222     |
| Concentration [T. low]   | 0.34638  | 0.28897    | 1.199   | 0.238276     |

## References

1. Liyanage, P. Y.; Graham, R. M.; Pandey, R. R.; Chusuei, C. C.; Mintz, K. J.; Zhou, Y.; Harper, J. K.; Wu, W.; Wikramanayake, A. H.; Vanni, S.; Leblanc, R. M., Carbon nitride dots: A selective bioimaging nanomaterial. *Bioconjugate Chem.* **2019**, *30*, 111-123.
